# Supplementary material for: Electrodepositing technique for improving the performance of crystalline and amorphous carbonaceous anodes for MFCs
Source: Royal Society of Chemistry journal article supplement (doi:10.1039/c6ra22867d), 2016-01-01
Supplement: c6ra22867d1.pdf [file c6ra22867d1.pdf]

## **Electrodepositing Technique for Improving the Performance of Crystalline and Amorphous Carbonaceous Anodes for MFCs**

**Hend Omar Mohamed<sup>1</sup>, M. Obaid<sup>1,2</sup>, Ahmed S. Yasin<sup>1</sup>, Jun Hee Kim<sup>1</sup> and Nasser A.  
M. Barakat<sup>1, 2,\*</sup>**

<sup>1</sup>Bio-Nanosystem Engineering Department, Chonbuk National University, Jeonju 561-756,  
Republic of South Korea

<sup>2</sup>Chemical Engineering Department, Faculty of Engineering, Minia University, Minia, Egypt

### **Corresponding author:**

Nasser A.M. Barakat,

Tel: +82632702363

Fax: +82632702348,

E-mail: [nasser@jbnu.ac.kr](mailto:nasser@jbnu.ac.kr)

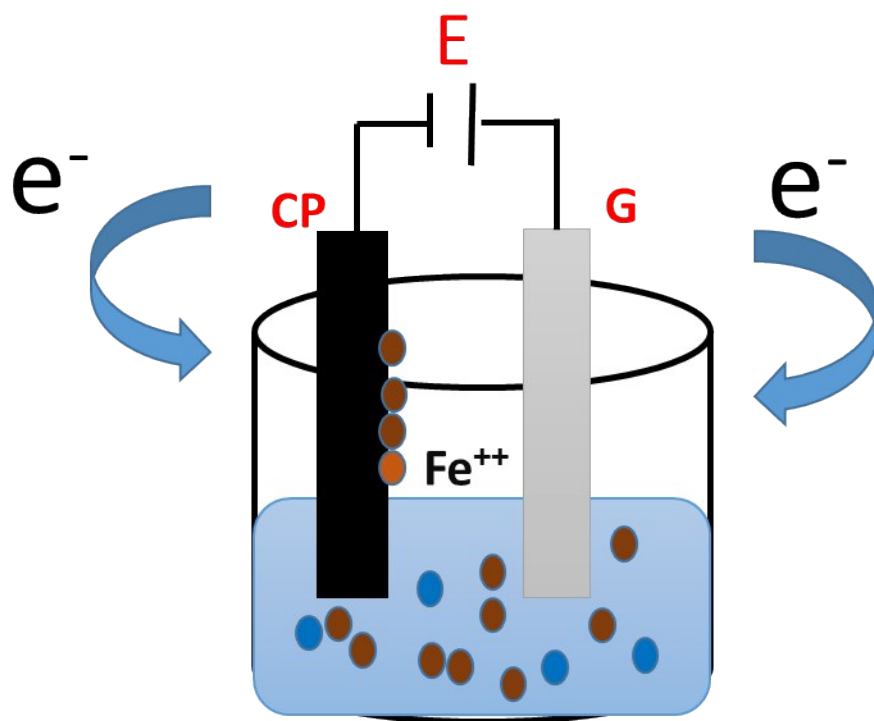

**Fig.S1: Electrolytic cell for the deposition of iron particles on the CP cathode (CP as an examples of the different electrodes).**

**Table S1: Chemical Characterizations of food wastewater.**

| pH  | Initial COD | Na <sup>+</sup> | Ca <sup>+2</sup> | Total P    | SO <sub>4</sub> <sup>-2</sup> | K <sup>+</sup> | TDS       | Conductivity |
|-----|-------------|-----------------|------------------|------------|-------------------------------|----------------|-----------|--------------|
| 6.5 | 960 mg/l    | 355.278 mg/l    | 33.8 mg/l        | 17.13 mg/l | 28 mg/l                       | 350.4 mg/l     | 1760 mg/l | 3580 μS/cm   |

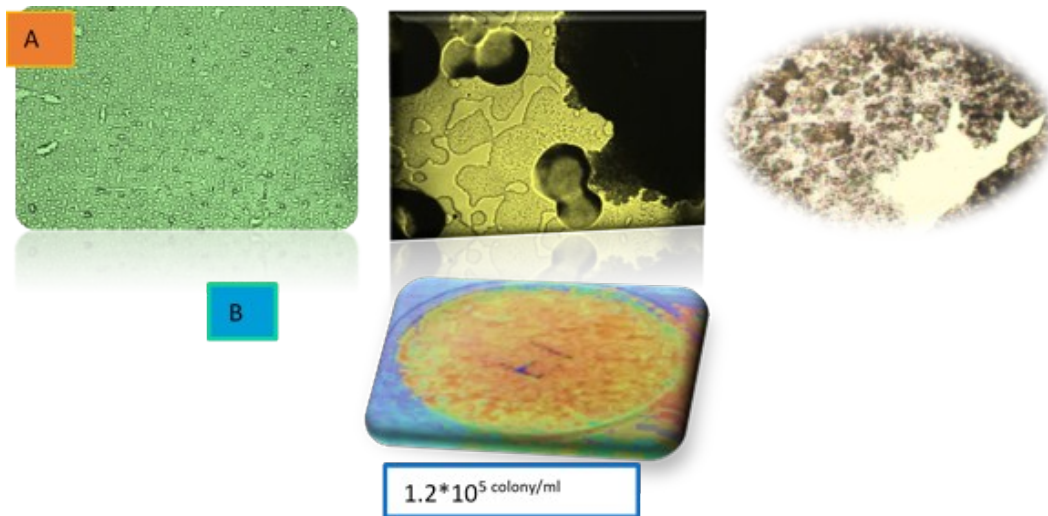

**Fig.S2: (A) Microscopic image of the microorganisms in the utilized food wastewater.**

**B) Agar test photo image**

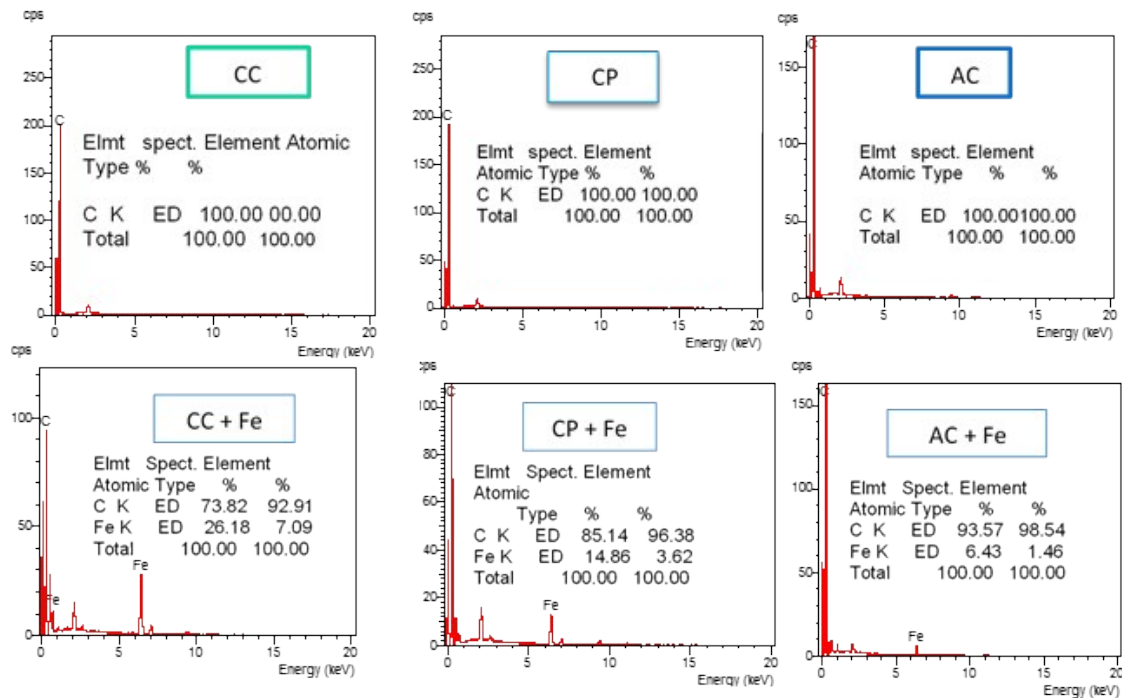

**Fig. S3: EDX analysis for different anode materials (different crystallinity) before and after treatment.**

**Table S2: The electrochemical measurements for different anode modification materials.**

| Anode            |           | Anode Potential (V) |        | OCV (V) |       | Time (h) |
|------------------|-----------|---------------------|--------|---------|-------|----------|
|                  |           | From                | To     | From    | To    |          |
| Carbon cloth     | Untreated | 0.222               | -0.205 | 0.478   | 0.806 | 100.5    |
|                  | Treated   | 0.213               | -0.218 | 0.489   | 0.827 | 79       |
| Carbon paper     | Untreated | 0.217               | -0.112 | 0.481   | 0.748 | 75       |
|                  | Treated   | 0.203               | -0.209 | 0.498   | 0.806 | 69       |
| Activated carbon | Untreated | 0.379               | -0.268 | 0.381   | 0.825 | 133      |
|                  | Treated   | 0.308               | -0.286 | 0.344   | 0.835 | 92.5     |

**Table S3: Summarizes the results of electrochemical measurements for the MFCs worked by the treated and untreated anodes.**

| Anode                   |           | Current density   |              | Power density     |              |
|-------------------------|-----------|-------------------|--------------|-------------------|--------------|
|                         |           | mAm <sup>-2</sup> | Increase (%) | mWm <sup>-2</sup> | Increase (%) |
| <b>Carbon cloth</b>     | Untreated | 252               | 231.3        | 80.4              | 47.5         |
|                         | Treated   | 835               |              | 118.6             |              |
| <b>Carbon paper</b>     | Untreated | 186.8             | 194.6        | 51.6              | 65.8         |
|                         | Treated   | 548               |              | 85.6              |              |
| <b>Activated carbon</b> | Untreated | 1690              | 42           | 335               | 18.5         |
|                         | Treated   | 2400              |              | 397               |              |

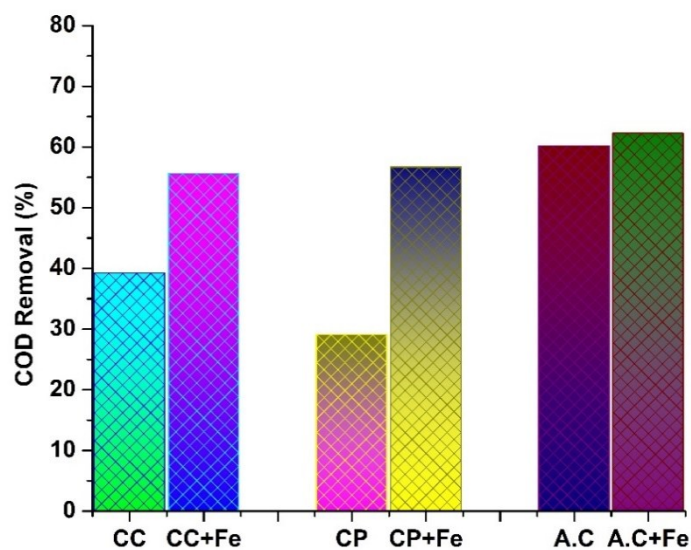

**Fig.S4: COD removal of wastewater treated in MFC cell using different anode materials treated and untreated with electrodeposition technique.**
